## Geo-spatial distribution of fluoride in drinking water resources in Eastern Iran

Nourahmad Nourafrouz, Ali Naghizadeh, Borhan Mansouri, Hamed Biglari, Elham Derakhshani and Vaibhav Thakkar

### ABSTRACT

The purpose of this study was to determine the fluoride concentrations in drinking water of the Khaf County in Eastern Iran. Moreover, health risk assessment of three age groups (children, teens and adults), sensitivity analysis and uncertainties in the risk estimates were carried out using Monte Carlo simulation. For this reason, drinking water in 33 villages and 5 cities of the Khaf County were collected during March to September 2018. Fluoride contents in drinking water samples were assayed by using a HACH-DR6000 spectrophotometer. Fluoride content in drinking water from urban area and rural area ranged from 0.50 to 0.91 mg L<sup>-1</sup> and 0.24 to 2.31 mg L<sup>-1</sup>. Among the population of the 33 villages, about 17 villages, corresponding to 51%, receive fluoride concentrations less than 0.5 mg L<sup>-1</sup> (minimum allowable concentration recommended by WHO), while the population of 4 villages, corresponding to 12%, receive fluoride concentrations higher than 1.5 mg L<sup>-1</sup> (the maximum allowable concentration of fluoride in drinking water recommended by the WHO). Moreover, our findings showed that the drinking water ingestion rate, fluoride concentration in water, and the fraction of skin in contact with water were the most important variable in calculating the Hazard quotient (HQ).

**Key words** | drinking water, fluoride, fluorosis, health risk

#### Nourahmad Nourafrouz

Department of Environmental Health Engineering,  
Student Research Committee, Faculty of Health,  
Birjand University of Medical Sciences,  
Birjand,  
Iran

#### Ali Naghizadeh (corresponding author)

##### Elham Derakhshani

Medical Toxicology and Drug Abuse Research  
Center (MTDRC) (BUMS),  
Birjand University of Medical Sciences,  
Birjand,  
Iran  
E-mail: [al.naghizadeh@yahoo.com](mailto:al.naghizadeh@yahoo.com)

#### Borhan Mansouri

Substance Abuse Prevention Research Center,  
Health Institute,  
Kermanshah University of Medical Sciences,  
Kermanshah,  
Iran

#### Hamed Biglari

Department of Environmental Health Engineering,  
School of Public Health, Social Development &  
Health Promotion Research Center,  
Gonabad University of Medical Sciences,  
Gonabad,  
Iran

#### Vaibhav Thakkar

Department of Public Health Dentistry,  
M.G.M. Dental College & Hospital,  
Navi Mumbai,  
India

### INTRODUCTION

Nowadays, a readily available access to safe drinking water resources is an important aspect of public health in many countries around the world including Iran (Garg & Malik 2004; Fallahzadeh *et al.* 2018). Iran is a vast country, and has diverse climatic conditions in comparison to other countries. Khorasan Razavi is located in the northeast of Iran. In the southern part of this province, because of its close proximity to the desert, a dry climate is dominant (Keshavarzi *et al.* 2006; Madani 2014; Soltani *et al.* 2016). Providing safe and quality drinking water will have a significant impact on sustaining life and social health.

Generally, potable water contains both essential and non-essential elements. A lot of elements such as calcium, manganese, and fluoride that exist in drinking water are essential for metabolic activities as well as human health (Nerbrand *et al.* 2003; Li *et al.* 2009; Kazi *et al.* 2018a, 2018b). However, increasing the concentration of trace elements in relation to the required level in the body can lead to health problems. Contamination of drinking water with fluoride and its potential health implications remain a major public health issue in many countries, especially in Iran (Yousefi *et al.* 2018). Therefore continuous

monitoring and control of drinking water quality is very important (WHO 2004).

Fluoride (F) is one of the mineral elements that exist in the earth's crust. This F ion is highly reactive due to the presence of a free electron in its upper electron layer, and is mostly present in compounds such as apatite and cryolite in nature (Kır *et al.* 2016). Contamination of surface and groundwater by fluoride can be traced to natural resources (availability and solubility of fluoride minerals and fluoride-bearing rocks) and anthropogenic resources (hydrofluoric production, fertilization, electroplating of metals, the electronics manufacturing industry) (Tor 2006; Xu *et al.* 2011). The World Health Organization (WHO) has recommended the minimum and maximum allowable concentration of fluoride in drinking water as 0.5 and 1.5 mg L<sup>-1</sup> respectively. Defluoridation processes are recommended for water supplies where their fluoride concentration is higher than the standards (Kazi *et al.* 2018a, 2018b).

Also, according to the United States Public Health Service (USPHS) the maximum allowable concentration of fluoride in water depends on climate conditions because air temperature affects the amount of water consumed and consequently the exposure to the amount of fluoride (USPHS 1963; WHO 2004; Miretzky & Cirelli 2011). The optimal water fluoride concentration depends on several parameters such as methods of food processing and cooking, amount of food and water intake, dietary habits of the community, local climatic conditions, and physio-chemical parameters of water (Grimaldo *et al.* 1995; Kaseva 2006; Maheshwari 2006). Although drinking water is the main source of human exposure to fluoride, food, dental products, and pesticides are other important sources for dealing with fluoride (Garg & Malik 2004; National Research Council 2007).

Fluoride fluctuations can be associated with health problem of consumers, so that low fluoride concentrations cause tooth decay, and high concentrations of this element in water increase the risk of dental and bone fluorosis. According to previous studies, nearly 80% of prevalence and incidence of diseases all over the world are related to low water quality. Also contamination of drinking water with fluoride accounts for 65% of endemic fluorosis (World Health Organization 2011). Moreover, long term exposure to high fluoride concentrations may lead to various diseases such as dental and skeletal fluorosis, low

hemoglobin levels, skin rashes, gland damage, gastrointestinal problems, infertility, abortions, neurotoxicological effects, and Alzheimer's disease (Sehn 2008; Choi *et al.* 2012; Choi *et al.* 2015). Research reported that more than 30 million people in China suffer from fluorosis and about 100 million people are exposed to it (Chen *et al.* 2010). In another study conducted by Huang *et al.* (2017), the authors reported that the concentration of fluoride in groundwater in California is more than 1.5 mg L<sup>-1</sup> (Huang *et al.* 2017).

Moreover, the variations of fluoride concentration in drinking water are one of the main problems in drinking water quality in Iran. In some cities in Iran, the amount of fluoride in drinking water is higher than 1.5 mg L<sup>-1</sup>, which can lead to fluorosis (Asgari *et al.* 2012). For example Qasemi *et al.* (2018) reported that 55% of the rural areas in Gonabad and 4.7% of the rural areas in Bajestan had fluoride levels below the minimum recommended value of WHO (Qasemi *et al.* 2018). In another study, Ghaderpoori *et al.* (2018) illustrated that the fluoride levels from all sampling stations in the water distribution network of Mashhad in Eastern Iran were below 0.5 mg L<sup>-1</sup> (Ghaderpoori *et al.* 2018). Therefore, the aim of this study was to determine the fluoride concentration of drinking water in 33 villages and five cities of the Khaf County, which is located in the southern part of Khorasan Razavi province, from March to September 2018. Moreover, we assessed the potential health risks from fluoride ingestion through drinking water for infants, children, teenagers and adults. The results of this study could be useful for future planning of water resources as well as public knowledge about health problems related to high fluoride concentrations.

## MATERIALS AND METHODS

The present study was descriptive-analytical and was performed experimentally on drinking water resources of Khaf County in Khorasan Razavi Province of Iran for determination of the fluoride ion concentration. The Khaf County contains five cities including Khaf, Nashtifan, Qasemabad, Salami, and Sangan. The climate of this region is hot and dry; that is, hot summers and cool winters. The mean annual temperature and rainfall in Khaf County are 18 °C and 120 mm respectively and the annual average of rainfall is about 255.7 mm. At the

2016 census, the county's population was 140,000 in 26,542 families. In the present study, all drinking water resources (38 wells and springs: five cities and 33 villages) were sampled in spring and summer of 2018 and their fluoride concentration was determined. The sampling locations as well as the map of Khaf County are shown in Figure 1.

Prior to sampling and accessing the drinking water resources, necessary coordination with the Water and Wastewater Administration was carried out and the required permissions were obtained. One-liter polyethylene containers were used to sample water from the studied areas. The containers were rinsed with acid and distilled water, and thoroughly cleaned before sampling. The date, time, and location of sampling were recorded on all the sampling containers. Then, samples were transferred to the laboratory by storing the cold chain (in 4 °C). Finally, fluoride concentrations in water samples were determined within 24 h after collection in the laboratory using a HACH-DR6000 spectrophotometer machine with SPADNS reagent. The detection limit for fluoride concentration was 0.02–0.2 mg L<sup>-1</sup> (method 8029). Moreover, in this study, Arc GIS 10.4.1 software (Esri, Berkeley, CA, USA) was used for spatial distribution of fluoride in the studied areas.

In this study, the daily exposure to fluoride by drinking water was estimated using Equations (1) and (2) (USEPA 2004; Fakhri *et al.* 2018):

$$EDI_{ing} = \frac{C_w \times IR_w \times EF \times ED}{BW \times AT} \quad (1)$$

$$EDI_{derm} = \frac{C_w \times SA \times K_p \times F \times ET_s \times EF \times ED \times 10^{-3}}{BW \times AT} \quad (2)$$

In this regard,  $EDI_{ing}$  estimates daily intake of fluoride consumed per day by drinking water and  $EDI_{derm}$  estimates the amount of fluoride received by skin absorption based on mg kg<sup>-1</sup> day<sup>-1</sup>.  $C_w$  is the concentration of fluoride in drinking water in mg L<sup>-1</sup>,  $IR_w$  is the drinking water ingestion rate based on L/day,  $EF$  is the exposure frequency based on day/year,  $ED$  is the exposure duration in terms of years,  $BW$  is the body weight in kg,  $AT$  is the averaging time in days,  $SA$  is the surface area of skin in terms of cm<sup>2</sup>,  $K_p$  is the coefficient of skin permeation (Cm/h), fluoride is the fraction of the contact surface of the skin with water (without unit) and  $ET_s$  is the exposure time when

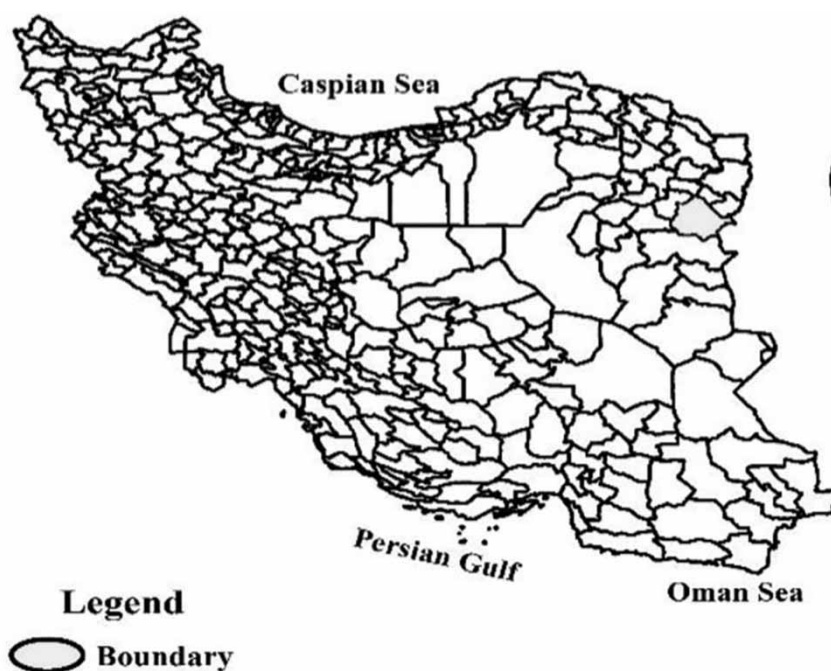

**Figure 1** | Map of the study area and sampling stations in Khaf County, Eastern Iran.

showering (h/day). The Hazard quotient (HQ) of the non-carcinogenic risk estimate for fluoride exposure through drinking water and dermal exposure is calculated using Equation (3).

$$HQ = \frac{EDI}{RfD} \quad (3)$$

*RfD* in this equation expresses the reference fluoride dose by a specific exposure pathway in  $\text{mg kg}^{-1} \text{ day}^{-1}$ . Based on the USEPA database, the amount of *RfD*, oral reference dose, through drinking water consumption is  $0.06 \text{ mg kg}^{-1} \text{ day}^{-1}$  (USEPA 2004).  $HQ < 1$  implies a negligible risk of non-carcinogenic impacts, whereas  $HQ > 1$  indicates potential non-cancer-causing health effects. Based on the USEPA, *RfD* represents the reference dose of fluoride in a specific exposure pathway ( $\text{mg kg}^{-1} \text{ day}^{-1}$ ).

### Monte Carlo simulation and sensitivity analysis

We used sensitivity analysis in Monte Carlo simulation to identify important and effective parameters in the output model (Table 1). Crystal Ball software was used to simulate Monte Carlo. We also used 1,000 trails to analyze the

sensitivity analysis. In this study, Crystal Ball (version 11.1.1.1, Oracle, Inc., USA) was used to simulate Monte Carlo and perform sensitivity analysis with 1,000 trails.

## RESULTS

### Fluoride concentration in drinking water

Based on Table 2, overall fluoride levels from all sampling sites in rural and urban residents living were  $0.69$  and  $0.70 \text{ mg L}^{-1}$  respectively. The minimum and maximum contents of fluoride ions in urban regions were  $0.50$  and  $0.99 \text{ mg L}^{-1}$  respectively, while the minimum and maximum content of fluoride ions in rural regions were  $0.18$  and  $2.31 \text{ mg L}^{-1}$  respectively. The variations of fluoride levels in drinking water of rural areas were more than urban areas. Based on results from Table 2, the population of 17 of 33 villages (51%) receive fluoride concentrations less than the limit recommended by WHO of  $0.5 \text{ mg L}^{-1}$ , while the population of 4 of 33 villages (12%) receive fluoride concentrations higher than the maximum allowable concentration of fluoride in drinking water recommended by the WHO of  $1.5 \text{ mg L}^{-1}$ . Moreover, distribution of fluoride levels in two seasons is presented in Figures 2 and 3, so

**Table 1** | Parameters used for the probabilistic risk model

| Parameters (units)                                           | Distribution type | Values                            |                                   |                                   |
|--------------------------------------------------------------|-------------------|-----------------------------------|-----------------------------------|-----------------------------------|
|                                                              |                   | Children                          | Teens                             | Adults                            |
| Skin surface area ( $\text{cm}^2$ )                          | Lognormal         | $7422 \pm 1.25$                   | $14321 \pm 1.18$                  | $18182 \pm 1.10$                  |
| Body weight (kg)                                             | Lognormal         | $16.68 \pm 1.48$                  | $46.25 \pm 1.18$                  | $57.03 \pm 1.10$                  |
| Ingestion rate (L/day)                                       | Normal            | $1.25 \pm 0.57$                   | $1.58 \pm 0.69$                   | $1.95 \pm 0.64$                   |
| Average time (days)                                          | Fixed value       | 2190                              | 2190                              | 9125                              |
| Exposure frequency (day/year)                                | Triangular        | Min: 180<br>Mode: 345<br>Max: 365 | Min: 180<br>Mode: 345<br>Max: 365 | Min: 180<br>Mode: 345<br>Max: 365 |
| Exposure duration (year)                                     | Fixed value       | 6                                 | 6                                 | 6                                 |
| Dermal permeability constant ( $\text{cm/h}$ )               | Fixed value       | $1 \times 10^{-3}$                | $1 \times 10^{-3}$                | $1 \times 10^{-3}$                |
| Exposure time in the shower (h/day)                          | Lognormal         | $0.13 \pm 0.0085$                 | $0.13 \pm 0.0085$                 | $0.13 \pm 0.0085$                 |
| Fraction of skin in contact with water                       | Uniform           | Min: 0.4                          | Min: 0.4                          | Min: 0.4<br>Max: 0.9              |
| Fraction of fluoride absorbed in gastrointestinal tract      | Fixed value       | 1                                 | 1                                 | 1                                 |
| Oral reference dose ( $\text{mg kg}^{-1} \text{ day}^{-1}$ ) | Fixed value       | 0.06                              | 0.06                              | 0.06                              |

**Table 2** | Fluoride concentrations ( $\text{mg L}^{-1}$ ; mean and SD) in drinking water and frequency of hypertension in Khaf County, Eastern Iran

| Stations              | Latitude     | Longitude   | Mean | SD    | Hypertension |
|-----------------------|--------------|-------------|------|-------|--------------|
| Urban areas           |              |             |      |       |              |
| Khaf                  | 34.58687672  | 60.16021906 | 0.50 | 0.233 | 463          |
| Nashtifan             | 34.47256712  | 60.20494397 | 0.54 | 0.339 | 451          |
| Salami                | 34.74197028  | 59.98430501 | 0.54 | 0.091 | 475          |
| Sangan                | 34.40604183  | 60.25967174 | 0.99 | 0.466 | 602          |
| Qasemabad             | 34.35702395  | 59.85749109 | 0.91 | 0.014 | 400          |
| Overall               |              |             | 0.69 | 0.229 |              |
| Rural areas           |              |             |      |       |              |
| Sayed Abad            | 34.84537916  | 59.78127279 | 0.36 | 0.304 | 74           |
| Sijavand              | 34.86352036  | 59.82868311 | 0.54 | 0.155 | 92           |
| Chaman Abad           | 34.8323684   | 59.80180461 | 0.41 | 0.240 | 114          |
| Mazrehshaikh          | 34.87756192  | 59.91496106 | 0.29 | 0.162 | 82           |
| Sadeh                 | 34.83145386  | 59.8949104  | 0.32 | 0.162 | 385          |
| Khalil Abad           | 34.7886955   | 59.85509389 | 0.24 | 0.169 | 45           |
| Hazarkhosheh          | 34.74454964  | 59.87032228 | 0.48 | 0.021 | 45           |
| Ahmad Abad            | 34.77200424  | 59.90665737 | 0.35 | 0.141 | 140          |
| Khair Abad            | 34.84628966  | 60.01281208 | 0.51 | 0.113 | 95           |
| Hassan Abad           | 34.72589944  | 59.89459892 | 0.45 | 0.063 | 89           |
| Chahar Deh            | 34.69690958  | 60.03558714 | 0.31 | 0.070 | 105          |
| Razdab                | 34.81018533  | 60.12416025 | 0.27 | 0.219 | 73           |
| Fayandar              | 34.66037219  | 60.0998979  | 0.46 | 0.077 | 70           |
| Mahabad               | 34.58204424  | 60.06729215 | 2.31 | 0.487 | 12           |
| Barakuh               | 34.68505963  | 60.17888137 | 0.58 | 0.205 | 35           |
| Khargerd              | 34.54038693  | 60.18422183 | 0.56 | 0.056 | 116          |
| Tizab                 | 34.5160017   | 60.17971262 | 0.44 | 0.148 | 108          |
| Barab                 | 34.42904011  | 60.23412234 | 0.69 | 0.120 | 303          |
| Nyaz Abad             | 34.23008266  | 60.24847463 | 1.40 | 0.148 | 83           |
| Goryab                | 34.42357785  | 60.33274451 | 0.38 | 0.141 | 6            |
| Dardoi                | 34.53296125  | 60.44891312 | 0.34 | 0.148 | 3            |
| Zuzan                 | 34.34673462  | 59.87040028 | 1.98 | 0.007 | 212          |
| Ebrahimi              | 34.28437761  | 59.87041319 | 1.56 | 0.268 | 66           |
| Baghbakhshi           | 34.45336889  | 59.52814272 | 0.65 | 0.148 | 80           |
| Chahgachi             | 34.24257021  | 59.5531057  | 0.70 | 0.148 | 68           |
| Kalshor (Abe-shirin)  | 34.02254292  | 59.79554483 | 0.29 | 0.070 | 57           |
| Kalshor (Abe-shor)    | 34.02310912  | 59.79846006 | 0.68 | 0.049 | 44           |
| Bonyabad (Abe-shor)   | 34.08077271  | 59.87445184 | 0.91 | 0.388 | 68           |
| Bonyabad (Abe-shirin) | 34.08007577v | 59.87634548 | 0.18 | 0.084 | 17           |
| Arg (Abe-shor)        | 34.1553623   | 59.91693782 | 1.85 | 0.155 | 10           |
| Aliabad               | 34.21794791  | 59.96414062 | 1.32 | 0.021 | 17           |
| Bias Abad             | 34.30870317  | 60.04716355 | 0.44 | 0.219 | 80           |
| Baghcheh              | 34.43245196  | 60.10808853 | 1.04 | 0.410 | 6            |
| Overall               |              |             | 0.70 | 0.161 |              |

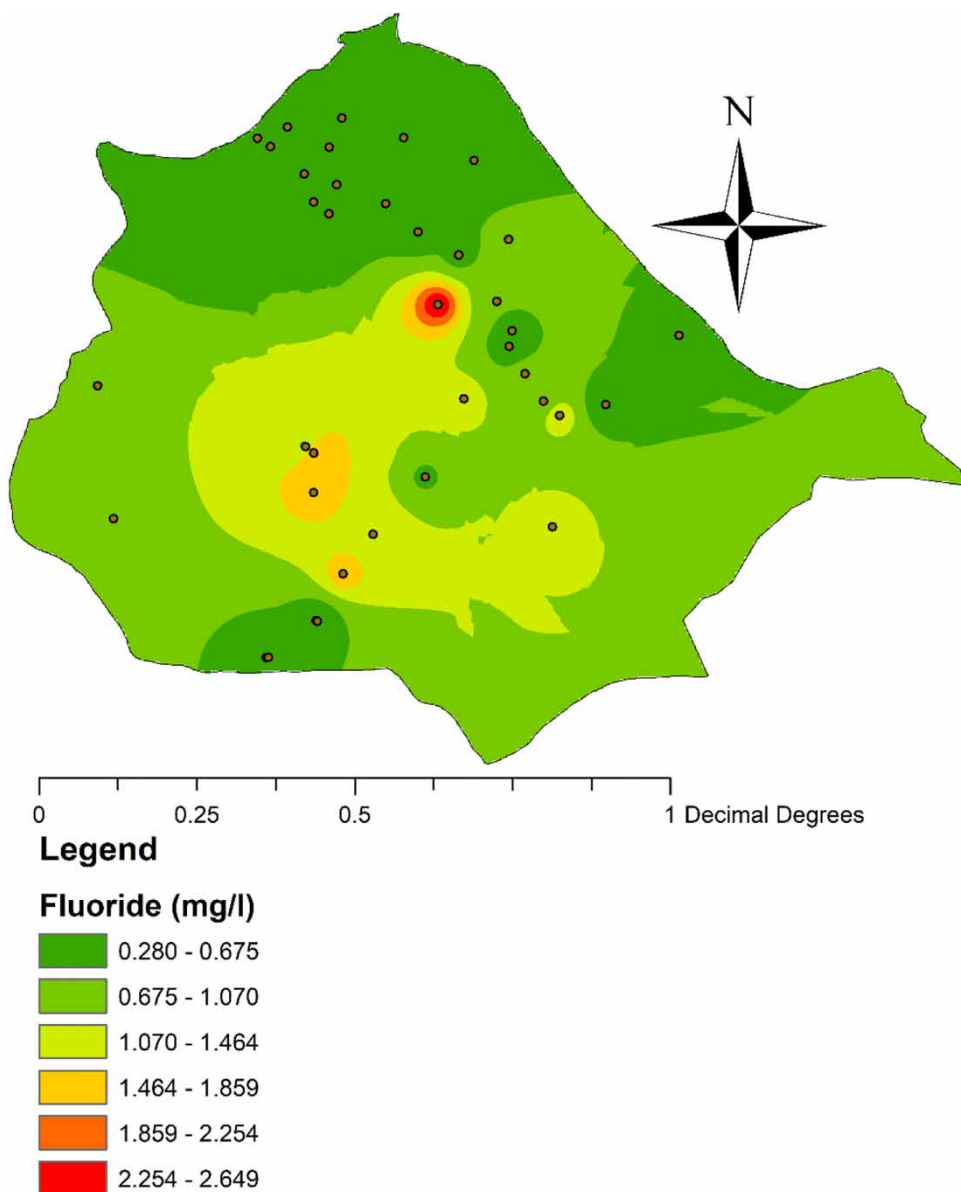

**Figure 2** | Distribution of fluoride concentrations in spring in Khaf County, Eastern Iran.

that the highest concentrations of fluoride in drinking water were in the center and south locations of the studied area.

#### Calculation of chronic daily intake of fluoride

Mean value of  $EDI_{ing}$  for children, teens and adults in urban areas was 0.025, 0.011, and 0.002  $mg\ kg^{-1}\ day^{-1}$  respectively, and for rural areas, the mean value of  $EDI_{ing}$  for children, teens and adults was 0.026, 0.011, 0.002  $mg\ kg^{-1}$

$day^{-1}$  respectively (Table 3). Furthermore, the mean value of the  $EDI_{derm}$  for fluoride in urban samples for children, teens and adults was  $7.964 \times 10^{-6}$  ( $6.218 \times 10^{-6}$  to  $1.129 \times 10^{-5}$ ), 0.0055 (0.0040 to 0.0078), and 0.0013 (0.0009 to 0.0019)  $mg\ kg^{-1}\ day^{-1}$  respectively (Table 3), and for rural areas, the mean value of the  $EDI_{derm}$  for fluoride in rural samples for children, teens and adults was  $8.087 \times 10^{-6}$  ( $8.044 \times 10^{-6}$  to  $2.641 \times 10^{-5}$ ), 0.0056 (0.0019 to 0.0183), and 0.0013 (0.0003 to 0.0045)  $mg\ kg^{-1}\ day^{-1}$  respectively.



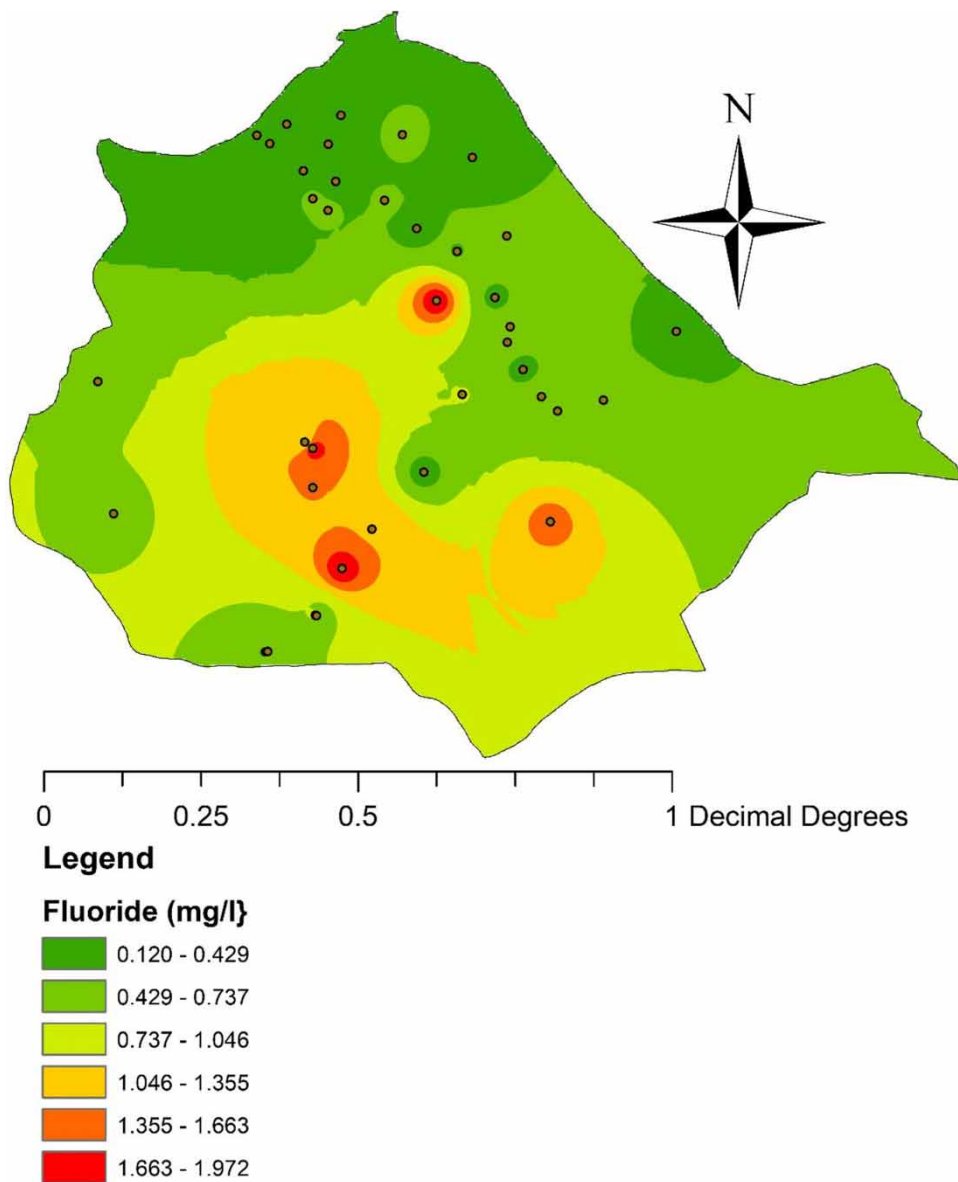

**Figure 3** | Distribution of fluoride concentrations in summer in Khaf County, Eastern Iran.

### Sensitivity analyses

Findings showed that the HQ value for consuming water containing fluoride for drinking was higher than the HQ level for dermal contact (Figure 4). Moreover, the most important variables affecting the value of  $HQ_{ing}$  in the three age groups are drinking water ingestion rate (IRw) and fluoride concentration in water (CW), while concentration of fluoride in water and the fraction of skin in

contact with water (F) are the most important variables in the value of  $HQ_{derm}$  in dermal contact. In the three age groups, IRw was the most important variable affecting  $HQ_{overall}$ . Figure 5 shows the results of the sensitivity analysis to assess the non-carcinogenic risk for the three age groups exposed to fluoride. In urban areas, IRw was the most important variable affecting the amount of health risk in the three age groups of children, teens, and adults. After IRw, fluoride concentration in drinking water (C) and exposure frequency

**Table 3** | EDI ( $\text{mg kg}^{-1} \text{ day}^{-1}$ ) for different age groups in the studied areas

| Stations              | EDI <sub>ing</sub> |        |         | EDI <sub>derm</sub> |        |        |
|-----------------------|--------------------|--------|---------|---------------------|--------|--------|
|                       | Children           | Teens  | Adults  | Children            | Teens  | Adults |
| <b>Urban areas</b>    |                    |        |         |                     |        |        |
| Khaf                  | 0.0186             | 0.0085 | 0.0020  | 5.8E-06             | 0.0040 | 0.0009 |
| Nashtifan             | 0.0199             | 0.0090 | 0.0021  | 6.2E-06             | 0.0042 | 0.0010 |
| Salami                | 0.0201             | 0.0091 | 0.0022  | 6.2E-06             | 0.0043 | 0.0010 |
| Sangan                | 0.0365             | 0.0166 | 0.0040  | 1.1E-05             | 0.0078 | 0.0019 |
| Qasemabad             | 0.0336             | 0.0153 | 0.0036  | 1.0E-05             | 0.0072 | 0.0017 |
| Overall               | 0.0257             | 0.0117 | 0.0028  | 8.0E-06             | 0.0055 | 0.0013 |
| <b>Rural areas</b>    |                    |        |         |                     |        |        |
| Sayed Abad            | 0.0134             | 0.0061 | 0.0014  | 4.2E-06             | 0.0028 | 0.0007 |
| Sijavand              | 0.0199             | 0.0090 | 0.0021  | 6.2E-06             | 0.0042 | 0.0010 |
| Chaman Abad           | 0.0151             | 0.0069 | 0.0016  | 4.7E-06             | 0.0032 | 0.0008 |
| Mazrehshaikh          | 0.0109             | 0.0049 | 0.0011  | 3.4E-06             | 0.0023 | 0.0005 |
| Sadeh                 | 0.0120             | 0.0054 | 0.0013  | 3.7E-06             | 0.0025 | 0.0006 |
| Khalil Abad           | 0.0088             | 0.0040 | 0.0009  | 2.7E-06             | 0.0019 | 0.0004 |
| Hazarkhosheh          | 0.0179             | 0.0081 | 0.0019  | 5.5E-06             | 0.0038 | 0.0009 |
| Ahmad Abad            | 0.0129             | 0.0058 | 0.0014  | 4.0E-06             | 0.0027 | 0.0006 |
| Khair Abad            | 0.0188             | 0.0085 | 0.0020  | 5.8E-06             | 0.0040 | 0.0010 |
| Hassan Abad           | 0.0168             | 0.0076 | 0.0018  | 5.2E-06             | 0.0036 | 0.0008 |
| Chahar Deh            | 0.0114             | 0.0052 | 0.0012  | 3.5E-06             | 0.0024 | 0.0006 |
| Razdab                | 0.0101             | 0.0046 | 0.0011  | 3.1E-06             | 0.0021 | 0.0005 |
| Fayandar              | 0.0171             | 0.0078 | 0.0018  | 5.3E-06             | 0.0036 | 0.0009 |
| Mahabad               | 0.0855             | 0.0390 | 0.0093  | 2.6E-05             | 0.0183 | 0.0045 |
| Barakuh               | 0.0216             | 0.0098 | 0.0023  | 6.7E-06             | 0.0046 | 0.0012 |
| Khargerdeh            | 0.0206             | 0.0094 | 0.0022  | 6.4E-06             | 0.0044 | 0.0010 |
| Tizab                 | 0.0164             | 0.0074 | 0.0018  | 5.1E-06             | 0.0035 | 0.0008 |
| Barab                 | 0.0256             | 0.0117 | 0.0028  | 7.9E-06             | 0.0055 | 0.0013 |
| Nyaz Abad             | 0.0519             | 0.0236 | 0.0056  | 1.6E-05             | 0.0111 | 0.0027 |
| Goryab                | 0.0140             | 0.0064 | 0.0015  | 4.3E-06             | 0.0030 | 0.0007 |
| Dardoi                | 0.0127             | 0.0058 | 0.0013  | 3.9E-06             | 0.0027 | 0.0006 |
| Zuzan                 | 0.0733             | 0.0334 | 0.0080  | 2.3E-05             | 0.0157 | 0.0038 |
| Ebrahimi              | 0.0576             | 0.0262 | 0.0063  | 1.8E-05             | 0.0123 | 0.0030 |
| Baghbakhshi           | 0.0242             | 0.0110 | 0.0026  | 7.5E-06             | 0.0052 | 0.0012 |
| Chahgachi             | 0.0260             | 0.0118 | 0.0028  | 8.0E-06             | 0.0055 | 0.0013 |
| Kalshor (Abe-shirin)  | 0.0107             | 0.0048 | 0.0011  | 3.3E-06             | 0.0023 | 0.0005 |
| Kalshor (Abe-shor)    | 0.0253             | 0.0115 | 0.0027  | 7.8E-06             | 0.0054 | 0.0013 |
| Bonyabad (Abe-shor)   | 0.0338             | 0.0154 | 0.0037  | 1.0E-05             | 0.0072 | 0.0017 |
| Bonyabad (Abe-shirin) | 0.0066             | 0.0030 | 0.0007  | 2.1E-06             | 0.0014 | 0.0003 |
| Arg (Abe-shor)        | 0.0683             | 0.0311 | 0.0074  | 2.1E-05             | 0.0146 | 0.0036 |
| Aliabad               | 0.0489             | 0.0223 | 0.0053  | 1.5E-05             | 0.0105 | 0.0025 |
| Bias Abad             | 0.0164             | 0.0074 | 0.00180 | 5.1E-06             | 0.0035 | 0.0008 |
| Baghcheh              | 0.0384             | 0.0175 | 0.0042  | 1.2E-05             | 0.0082 | 0.0020 |
| Overall               | 0.0261             | 0.0119 | 0.0028  | 8.2E-06             | 0.0056 | 0.0013 |



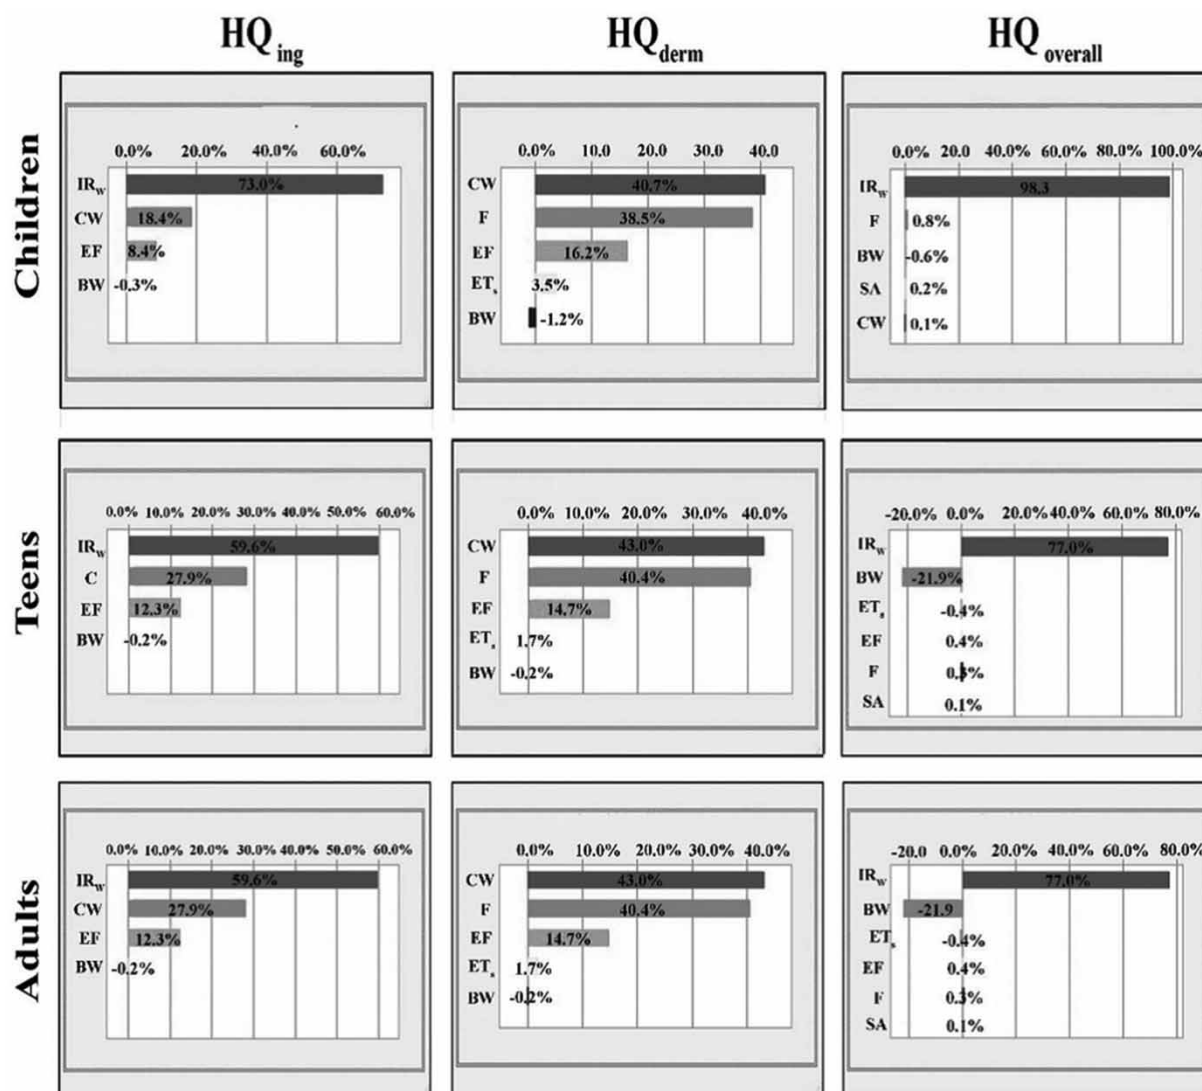

Figure 4 | Sensitivity analysis based on the type of dermal contact and drinking water ingestion for different age groups.

(EF) were the most effective variable on the value of health risk assessment in cities and rural areas.

## DISCUSSION

The fluoride concentrations in drinking water of Khaf County ranged from  $0.50 \text{ mg L}^{-1}$ – $0.99 \text{ mg L}^{-1}$  in urban areas whereas the ranges in rural region were  $0.18 \text{ mg L}^{-1}$ – $2.31 \text{ mg L}^{-1}$ . Although the fluoride levels determined in some rural areas were outside the range of that

recommended by WHO, in temperate regions, where water intake is low, a fluoride level up to  $1.5 \text{ mg L}^{-1}$  is acceptable (World Health Organization 2011). Populations of 4 villages in the studied area were exposed to fluoride content higher than the WHO's maximum allowable concentration. On the other hand, it is illustrated that a higher concentration of fluoride in drinking water than  $0.7 \text{ mg L}^{-1}$  can pose some adverse health effects such as fluorosis, so that fluorosis prevalence was reported in different provinces of Iran (Fallahzadeh et al. 2018; Yousefi et al. 2018; Keramati et al. 2019). Moreover, some studies done in

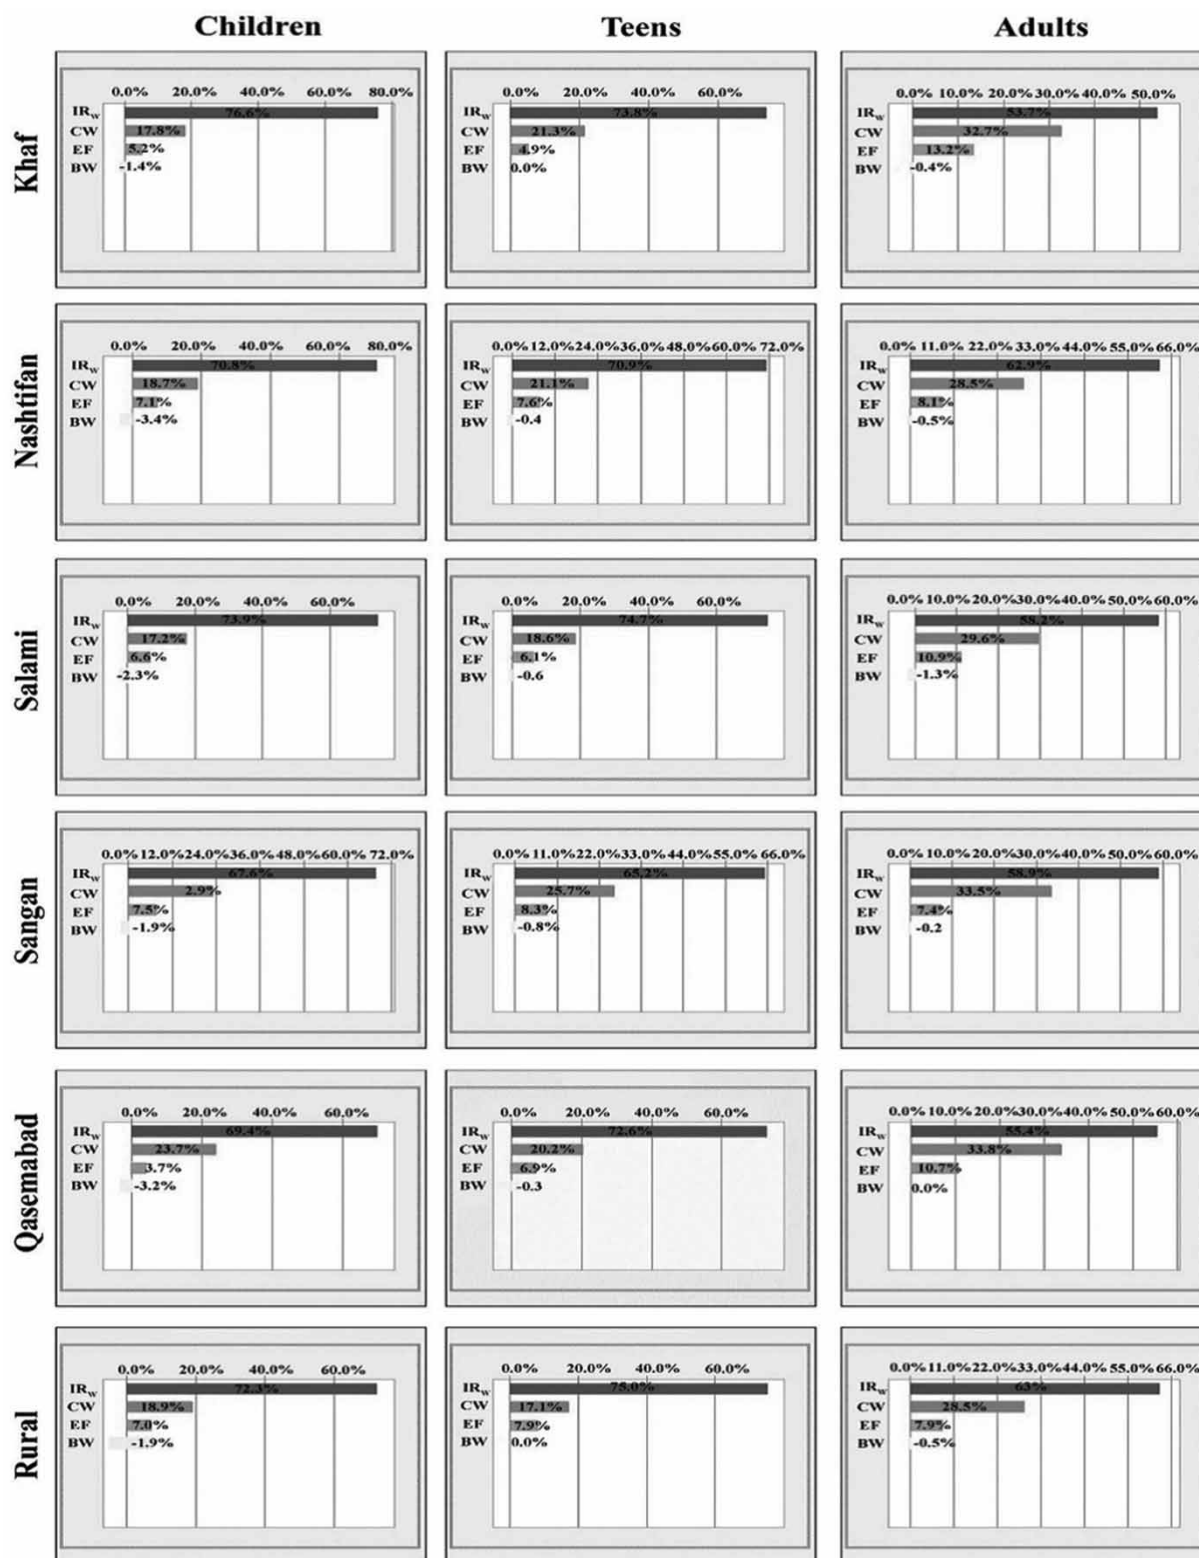

Figure 5 | Sensitivity analysis results for three age groups of children, teens and adults in studied regions.

Saudi Arabia and Mexico also reported the presence of fluoride levels in drinking water exceeding the permissible limits (Hurtado *et al.* 2000; Brahman *et al.* 2014). Almost 200 million people from 25 countries are at risk of health problems for high concentration of fluoride in their drinking water (Ayooob & Gupta 2006; Amouei *et al.* 2012; Huang *et al.* 2017). There is a pressing need for de-fluoridation activities to be carried out in high-risk regions whose drinking water contains higher fluoride concentration (Chidambaram *et al.* 2013; Habuda-Stani *et al.* 2014).

Hard tissue deformities like dental and skeletal fluorosis are seen in populations exposed to high levels of fluoride in drinking water (Fordyce 2011). Higher concentrations cause damage to the soft tissues like liver, kidney, lung, and testis and may also induce skeletal cancer and neurotoxicological effects (Bassin *et al.* 2006; Barbier *et al.* 2010; Zhang *et al.* 2016). Fluoride levels of up to  $1.5 \text{ mg L}^{-1}$  in drinking water are acceptable for maximum benefits and minimum risks, which is also recommended by WHO, other organizations in other countries, such as the European Union (DECLG), Canada (Ottawa), Australia (NHMRC), Ozsvath and India (BIS) (Ozsvath 2009; European Union 2014; Government of Canada 2010; World Health Organization 2011; NHMRC 2011; IS10500 B 2012). The US Public Health Service has set the optimum concentration of fluoride in drinking water at  $0.7 \text{ mg L}^{-1}$  (Kohn *et al.* 2001).

Fluoride levels in drinking water of 17 villages in Khaf County were less than the limit recommended by WHO. Hence, it was observed that different areas within the same county demonstrated differing levels of fluoride in drinking water. When the fluoride level in drinking water is less than  $0.5 \text{ mg L}^{-1}$ , the risk of dental caries increases (Dissanayake 1991; Ozsvath 2009). The low level of fluoride in drinking water observed in these regions was similar to those observed in various other studies (Huang *et al.* 2017; Ram *et al.* 2017). The villages with fluoride content less than  $0.5 \text{ mg L}^{-1}$  may require fluoridation programs, health education initiatives, fluoride supplements or any other combined strategies for prevention of dental caries in their population. Another recommendation is to establish a drinking water supply from deep wells with adequate fluoride content in that region with suitable conditions. Prevention of dental caries and strengthening of bones is observed when a population is exposed to low concentration of

fluoride ( $0.5\text{--}1.5 \text{ mg L}^{-1}$ ) in drinking water (Dissanayake 1991; Ozsvath 2009).

In our study, we also observed that children exposed to high levels of fluoride in drinking water demonstrated dental fluorosis. In similar studies, Huang *et al.* (2017), Guissouma *et al.* (2017), and Fallahzadeh *et al.* (2018) reported that the children age group was the population more at potential health risk of fluoride than other age groups (Guissouma *et al.* 2017; Huang *et al.* 2017; Fallahzadeh *et al.* 2018). The chronic daily intake of fluoride (daily exposure) was calculated in this study for three different age groups and both in rural as well as urban areas. The mean value of both  $\text{EDI}_{\text{ing}}$  and  $\text{EDI}_{\text{derm}}$  was more in the children group compared to teens and adults, both in rural as well as urban areas. Signifying higher daily exposure of fluoride content in the children's age-group, this may have higher risk of adverse effects in them. Humans could be exposed to fluoride in drinking water through oral intake, dermal absorption, and inhalation. It was observed that health risk values (HQ) were higher for exposure to fluoride through consumption of water containing fluoride ( $\text{HQ}_{\text{ing}}$ ) than for exposure through dermal contact ( $\text{HQ}_{\text{derm}}$ ). Out of all the variables considered for this analysis, the most important variables affecting the value of  $\text{HQ}_{\text{ing}}$  in all the three age groups were drinking water ingestion rate (IRW) and fluoride concentration in water (CW), while concentration of fluoride in water and the fraction of skin in contact with water (F) were the most important variables in the value of  $\text{HQ}_{\text{derm}}$  in dermal contact. These observations were in accordance with the previous studies done in different populations in the same as well as different countries. For more accurate health risk assessment of fluoride exposure in further studies, there should be more focus on these parameters identified by sensitivity analysis (Huang *et al.* 2017; Fallahzadeh *et al.* 2018).

In our study, the overall HQ value was less than 1, indicating that there was negligible risk of non-carcinogenic effect of exposure to fluoride for the population of Khaf County. Similarly, in a study done by Zhang *et al.* (2016), the calculated national mean non-carcinogenic risk for Chinese residents were lower than 1, thus indicating the absence of potential health effects at the national level. However, the HQs of fluoride were  $>1$  in some areas, which may pose possible health risks to local residents

(Zhang *et al.* 2016). Among the three age groups assessed in this study, children were at the highest non-carcinogenic risk possibly because children have the lowest BW, and other exposure parameters are similar to those of teens and adults. These findings are consistent with the study done by Huang *et al.* (2017). In a study conducted by Guissouma *et al.* (2017), it was observed that consumers of drinking water in areas where the HQ is higher than the guidelines suffer from dental fluorosis (Guissouma *et al.* 2017). The fluoride level in drinking water is not the recommended standard for the control of dental caries; on the basis of the socioeconomic and climatic conditions and the dietary and oral hygiene habits of their population, each country should determine the concentrations of fluoride in drinking water (Khan *et al.* 2004). Although fluoride in drinking water is commonly considered the greatest contributor to daily intake, other fluoride sources, including beverages, food-stuffs and fluoride supplements, may also significantly contribute to daily fluoride intake (Erdal & Buchanan 2004; Li *et al.* 2009).

Hence, in this study, the non-carcinogenic risk due to exposure to fluoride could be underestimated because only the drinking water and dermal absorption exposure pathway was considered. Additional data related to fluoride exposure should be collected from each exposure pathway, and by considering additional resources and time, accurate and precise estimates should be further investigated. In future studies, to obtain accurate data on health risk estimates of fluoride exposure on the population of Khaf County, fluoride exposure via inhalation should be investigated. Measures should be implemented to strengthen the timely monitoring of fluoride levels in drinking water in Khaf County.

## CONCLUSION

The findings of this study indicated that the fluoride levels in drinking water in rural and urban areas was 0.70 and 0.69 mg L<sup>-1</sup> respectively, although fluoride concentrations in rural areas showed more variation than urban areas. Moreover, our results showed that the HQ value for consuming water containing fluoride for drinking was higher than the HQ level for dermal contact. Sensitivity analysis illustrated that the drinking water ingestion rate and

fluoride concentration in water were the most important variables affecting the value of HQ<sub>ing</sub>, while the concentration of fluoride in water and the fraction of skin in contact with water were the most important variables in the value of HQ<sub>derm</sub> in dermal contact in three age groups. As a result, the overall HQ in the studied areas was less than 1, indicating that there was negligible risk of non-carcinogenic effect of exposure to fluoride.

## ACKNOWLEDGEMENTS

The authors of this study gratefully acknowledge the Research Council of Birjand University of Medical Sciences (Grant Number: 97/125) for the financial support.

## REFERENCES

- Amouei, A., Mahvi, A., Mohammadi, A., Asgharnia, H., Fallah, S. & Khafajeh, A. 2012 Fluoride concentration in potable groundwater in rural areas of Khaf city, Razavi Khorasan province, Northeastern Iran. *The International Journal of Occupational and Environmental Medicine* **3** (4), 201–203.
- Asgari, G., Roshani, B. & Ghanizadeh, G. 2012 The investigation of kinetic and isotherm of fluoride adsorption onto functionalize pumice stone. *Journal of Hazardous Materials* **217**, 123–132.
- Ayoob, S. & Gupta, A. K. 2006 Fluoride in drinking water: a review on the status and stress effects. *Critical Reviews in Environmental Science and Technology* **36**, 433–487.
- Barbier, O., Arreola-Mendoza, L. & Del razo, L. M. 2010 Molecular mechanisms of fluoride toxicity. *Chemico-biological Interactions* **188**, 319–333.
- Bassin, E. B., Wypij, D., Davis, R. B. & Mittleman, M. A. 2006 Age-specific fluoride exposure in drinking water and osteosarcoma (United States). *Cancer Causes & Control* **17**, 421–428.
- Brahman, K. D., Kazi, T. G., Baig, J. A., Afridi, H. I., Arain, S. S., Khan, A. & Arain, M. B. 2014 Fluoride and arsenic exposure through water and grain crops in Nagarparkar, Pakistan. *Chemosphere* **100**, 182–189.
- Chen, N., Zhang, Z., Feng, C., Sugiura, N., Li, M. & Chen, R. 2010 Fluoride removal from water by granular ceramic adsorption. *Journal of Colloid and Interface Science* **348**, 579–584.
- Chidambaram, S., Manikandan, S., Ramanathan, A., Prasanna, M., Thivya, C., Karmegam, U., Thilagavathi, R. & Rajkumar, K. 2013 A study on the defluoridation in water by using natural soil. *Applied Water Science* **3**, 741–751.
- Choi, A. L., Sun, G., Zhang, Y. & Grandjean, P. 2012 Developmental fluoride neurotoxicity: a systematic review

- and meta-analysis. *Environmental Health Perspectives* **120**, 1362–1368.
- Choi, A. L., Zhang, Y., Sun, G., Bellinger, D. C., Wang, K., Yang, X. J., Li, J. S., Zheng, Q., Fu, Y. & Grandjean, P. 2015 Association of lifetime exposure to fluoride and cognitive functions in Chinese children: a pilot study. *Neurotoxicology and Teratology* **47**, 96–101.
- Dissanayake, C. 1991 The fluoride problem in the ground water of Sri Lanka – environmental management and health. *International Journal of Environmental Studies* **38**, 137–155.
- European Union 2014 European Union (Drinking Water) Regulations, SI No. 122. European Union, Brussels, Belgium.
- Erdal, S. & Buchanan, S. N. 2004 A quantitative look at fluorosis, fluoride exposure, and intake in children using a health risk assessment approach. *Environmental Health Perspectives* **113**, 111–117.
- Fakhri, Y., Mohseni-Bandpei, A., Oliveri Conti, G., Ferrante, M., Cristaldi, A., Jeihooni, A., Karimi Dehkordi, M., Alinejad, A., Rasoulzadeh, H., Mohseni, S., Sarkhosh, M., Keramati, H., Moradi, B., Amanidaz, N. & Baninameh, Z. 2018 Systematic review and health risk assessment of arsenic and lead in the fished shrimps from the Persian gulf. *Food and Chemical Toxicology* **113**, 278–286.
- Fallahzadeh, R. A., Miri, M., Taghavi, M., Gholizadeh, A., Anbarani, R., Hosseini-Bandegharai, A., Ferrante, M. & Conti, G. O. 2018 Spatial variation and probabilistic risk assessment of exposure to fluoride in drinking water. *Food and Chemical Toxicology* **113**, 314–321.
- Fordyce, F. M. 2011 Fluorine: human health risks. In: *Encyclopedia of Environmental Health* (J. O. Nriagu, ed.), Vol. 2, pp. 776–785. Elsevier, New York, NY.
- Garg, V. & Malik, A. 2004 Groundwater quality in some villages of Haryana, India: focus on fluoride and fluorosis. *Journal of Hazardous Materials* **106**, 85–97.
- Ghaderpoori, M., Paydar, M., Zarei, A., Alidadi, H., Najafpoor, A. A., Gohary, A. H. & Shams, M. 2018 Health risk assessment of fluoride in water distribution network of Mashhad, Iran. *Human and Ecological Risk Assessment: An International Journal* **25** (4), 1–12.
- Government of Canada 2010 *Guidelines for Canadian Drinking Water Quality: Guideline Technical Document – Fluoride*. Federal-Provincial-Territorial Committee on Drinking Water. Government of Canada, Ottawa, ON, Canada.
- Grimaldo, M., Borjaaburto, V. H., Ramirez, A. L., Ponce, M., Rosas, M. & Diazbarriga, F. 1995 Endemic fluorosis in San-Luis-Potosi, Mexico. 1. Identification of risk-factors associated with human exposure to fluoride. *Environmental Research* **68**, 25–30.
- Guissouma, W., Hakami, O., Al-Rajab, A. J. & Tarhouni, J. 2017 Risk assessment of fluoride exposure in drinking water of Tunisia. *Chemosphere* **177**, 102–108.
- Habuda-Stani, M., Ravanèi, M. & Flanagan, A. 2014 A review on adsorption of fluoride from aqueous solution. *Materials* **7**, 6317–6366.
- Huang, D., Yang, J., Wei, X., Qin, J., Ou, S., Zhang, Z. & Zou, Y. 2017 Probabilistic risk assessment of Chinese residents' exposure to fluoride in improved drinking water in endemic fluorosis areas. *Environmental Pollution* **222**, 118–125.
- Hurtado, R., Gardea-Torresdey, J. & Tiemann, K. 2000 Fluoride occurrence in tap water at 'Los Altos de Jalisco', in the central Mexico region. In: *Proceedings of the 2000 Conference on Hazardous Waste Research: Environmental Changes and Solutions to Resource Development, Production, and use*, pp. 23–25.
- IS10500, B 2012 *Indian Standard Drinking Water-Specification (Second Revision)*. Bureau of Indian Standards (BIS), New Delhi.
- Kaseva, M. 2006 Contribution of trona (*magadi*) into excessive fluorosis – a case study in Maji ya Chai ward, northern Tanzania. *Science of the Total Environment* **366**, 92–100.
- Kazi, T. G., Brahman, K. D., Baig, J. A. & Afridi, H. I. 2018a A new efficient indigenous material for simultaneous removal of fluoride and inorganic arsenic species from groundwater. *Journal of Hazardous Materials* **357** (5), 159–167.
- Kazi, T. G., Brahman, K. D., Afridi, H. I., Shah, F. & Arain, M. B. 2018b Effects of high fluoride content in livestock drinking water on milk samples of different cattle in endemic area of Pakistan: risk assessment for children. *Environmental Science and Pollution Research* **25**, 12909–12914.
- Keramati, H., Miri, A., Baghaei, M., Rahimizadeh, A., Ghorbani, R., Fakhri, Y., Bay, A., Moradi, M., Bahmani, Z., Ghaderpoori, M. & Mousavi Khaneghah, A. 2019 Fluoride in Iranian drinking water resources: a systematic review, meta-analysis and non-carcinogenic risk assessment. *Biological Trace Element Research* **188**, 261–273.
- Keshavarzi, A., Sharifzadeh, M., Haghighi, A. K., Amin, S., Keshtkar, S. & Bamdad, A. 2006 Rural domestic water consumption behavior: a case study in Ramjerd area, Fars province, IR Iran. *Water Research* **40**, 1173–1178.
- Khan, A. A., Whelton, H. & O'Mullane, D. 2004 Is the fluoride level in drinking water a gold standard for the control of dental caries? *International Dental Journal* **54**, 256–260.
- Kir, E., Oruc, H., Kir, I. & Sardohan-Koseoglu, T. 2016 Removal of fluoride from aqueous solution by natural and acid-activated diatomite and ignimbrite materials. *Desalination and Water Treatment* **57**, 21944–21956.
- Kohn, W. G., Maas, W. R., Malvitz, D. M., Presson, S. M. & Shaddix, K. K. 2001 Recommendations for using fluoride to prevent and control dental caries in the United States.
- Li, H.-R., Liu, Q.-B., Wang, W.-Y., Yang, L.-S., Li, Y.-H., Feng, F.-J., Zhao, X.-Y., Hou, K. & Wang, G. 2009 Fluoride in drinking water, brick tea infusion and human urine in two counties in Inner Mongolia, China. *Journal of Hazardous Materials* **167**, 892–895.
- Madani, K. 2014 Water management in Iran: what is causing the looming crisis? *Journal of Environmental Studies and Sciences* **4**, 315–328.
- Maheshwari, R. 2006 Fluoride in drinking water and its removal. *Journal of Hazardous Materials* **137**, 456–463.



- Miretzky, P. & Cirelli, A. F. 2011 [Fluoride removal from water by chitosan derivatives and composites: a review](#). *Journal of Fluorine Chemistry* **132**, 231–240.
- National Research Council 2007 *Fluoride in Drinking Water: A Scientific Review of EPA's Standards*. National Academies Press, Washington, DC.
- Nerbrand, C., Agréus, L., Arvidsson Lenner, R., Nyberg, P. & Svärdsudd, K. 2003 [The influence of calcium and magnesium in drinking water and diet on cardiovascular risk factors in individuals living in hard and soft water areas with differences in cardiovascular mortality](#). *BMC Public Health* **3**, 21.
- Nhmrc, N. 2011 *Australian Drinking Water Guidelines Paper 6 National Water Quality Management Strategy*. National Health and Medical Research Council, National Resource Management Ministerial Council, Commonwealth of Australia, Canberra, pp. 7–5.
- Ozsvath, D. L. 2009 [Fluoride and environmental health: a review](#). *Reviews in Environmental Science and Bio/Technology* **8**, 59–79.
- Qasemi, M., Afsharnia, M., Zarei, A., Farhang, M. & Allahdadi, M. 2018 Non-carcinogenic risk assessment to human health due to intake of fluoride in the groundwater in rural areas of Gonabad and Bajestan, Iran: a case study. *Human and Ecological Risk Assessment: An International Journal* **25** (5), 1–12.
- Ram, S. M., Thakkar, V. P. & Machale, P. 2017 [Determination of fluoride level in drinking water from water samples in Navi Mumbai, Maharashtra](#). *Journal of Indian Association of Public Health Dentistry* **15**, 395.
- Sehn, P. 2008 [Fluoride removal with extra low energy reverse osmosis membranes: three years of large scale field experience in Finland](#). *Desalination* **223**, 73–84.
- Soltani, M., Laux, P., Kunstmann, H., Stan, K., Sohrabi, M., Molanejad, M., Sabziparvar, A., Saadatabadi, A. R., Ranjbar, F. & Rousta, I. 2016 [Assessment of climate variations in temperature and precipitation extreme events over Iran](#). *Theoretical and Applied Climatology* **126**, 775–795.
- Tor, A. 2006 [Removal of fluoride from an aqueous solution by using montmorillonite](#). *Desalination* **201**, 267–276.
- USEPA 2004 *Risk Assessment Guidance for Superfund. Volume I: Human Health Evaluation Manual (Part A)*. EPA, Washington, DC.
- USPHS 1963 Public Health Service drinking water standards. US Dept. of Health, Education, and Welfare, Public Health Service [for sale by the Superintendent of Documents, US Government Printing Office].
- WHO 2004 Guidelines for drinking-water quality: recommendations. World Health Organization, Washington, DC, USA.
- World Health Organization 2011 *Guidelines for Drinking-Water Quality*. 4th edn. World Health Organization, Geneva, Switzerland.
- Xu, X., Li, Q., Cui, H., Pang, J., Sun, L., An, H. & Zhai, J. 2011 [Adsorption of fluoride from aqueous solution on magnesia-loaded fly ash cenospheres](#). *Desalination* **272**, 233–239.
- Yousefi, M., Yaseri, M., Nabizadeh, R., Hooshmand, E., Jalilzadeh, M., Mahvi, A. H. & Mohammadi, A. A. 2018 Association of hypertension, body mass index, and waist circumference with fluoride intake; water drinking in residents of fluoride endemic areas, Iran. *Biological Trace Element Research* **185** (2), 1–7.
- Zhang, S., Niu, Q., Gao, H., Ma, R., Lei, R., Zhang, C., Xia, T., Li, P., Xu, C. & Wang, C. 2016 [Excessive apoptosis and defective autophagy contribute to developmental testicular toxicity induced by fluoride](#). *Environmental Pollution* **212**, 97–104.

First received 11 September 2019; accepted in revised form 5 May 2020. Available online 25 May 2020
